**Full title: Social media discourse and internet search queries on cannabis as a medicine: A systematic review**

**Short title: Social media discourse and search queries on cannabis as medicine**

Sedigheh Khademi Habibabadi<sup>1\*</sup>, Yvonne Ann Bonomo<sup>1,2, #b</sup>, Mike Conway<sup>3, #c</sup>, and Christine Mary Hallinan<sup>1, #a, \*</sup>

<sup>1</sup>Department of General Practice, Melbourne Medical School, Faculty of Medicine, Dentistry & Health Sciences, The University of Melbourne, Victoria, Australia

<sup>2</sup>Centre for Digital Transformation of Health, Victorian Comprehensive Cancer Centre, The University of Melbourne, Victoria, Australia

<sup>3</sup>St Vincent's Health - Department of Addiction Medicine, Melbourne, Victoria, Australia

<sup>#a</sup> Current address: Department of General Practice, Melbourne Medical School, Faculty of Medicine, Dentistry & Health Sciences of the University of Melbourne, Level 3, 780 Elizabeth Street, Carlton, Victoria, 3053

<sup>#b</sup> Current address: St Vincent's Health - Department of Addiction Medicine 38 Fitzroy Street, Fitzroy, Victoria, 3065

<sup>#c</sup> Current address: Centre for Digital Transformation of Health, Victorian Comprehensive Cancer Centre, The University of Melbourne, Victoria, Australia

\* Corresponding authors

Email: [Sedigh.Khademi@unimelb.edu.au](mailto:Sedigh.Khademi@unimelb.edu.au); [hallinan@unimelb.edu.au](mailto:hallinan@unimelb.edu.au)

## 1 **Abstract**

2 **Objective:** To systematically review the current published literature that uses social media data  
3 and internet search engine queries to identify emerging themes on the use of cannabis as a  
4 medicine. In this study, the term cannabis as a medicine refers to the use of cannabis with  
5 therapeutic intent and includes prescribed cannabis, over-the-counter cannabis, and non-  
6 prescribed cannabis used specifically for self-medication (not for recreational purposes).

7 **Materials and Methods:** For this systematic review, Medline, Scopus, Web of Science and  
8 Embase databases were searched for peer reviewed studies published in English between January  
9 2010 and March 2022. All study types that examined social media data and cannabis as a  
10 medicine were included in the review.

11 **Results:** Forty studies were included in this review. 21 studies used manually labeled data, 4  
12 studies used existing meta-data, 2 studies used data from social media analytics companies and  
13 13 used computational methods for annotating data. More than half of the studies 22/40 (55%),  
14 were published in the last three years. The incidental use of cannabis as a medicine was found in  
15 eleven studies that were focused on more general health-related issues, rather than on medicinal  
16 cannabis only.

17 **Conclusion:** Our systematic review has revealed the growing interest in analyzing user-  
18 generated content for studying cannabis as a medicine. This review has also highlighted the need  
19 for studies into cannabis use for specific health conditions and for automatic processing of larger  
20 datasets using computational methods (machine learning technologies).

21

22

## 23 **Introduction**

24 The plant cannabis sativa was first cultivated for use as a medicine in the Stone Age (1). From  
25 the 1800's individuals accessed cannabis as a medicine by either prescription or as an over the  
26 counter therapeutic (2). Yet by the mid-20th century, cannabis use was prohibited in many parts  
27 of the developed world with the passing of legislation in the USA, the UK and various European  
28 countries that proscribed its use (3-6) More recently, new evidence regarding the clinical efficacy  
29 of cannabis for some conditions (7) has stimulated public interest in cannabis and cannabis-  
30 derived products (8, 9), resulting in a global trend towards public acceptance, and subsequent  
31 legalization of cannabis for both medicinal and recreational use.

32 There is emerging evidence of cannabis efficacy for childhood epilepsy, spasticity and  
33 neuropathic pain in multiple sclerosis, acquired immunodeficiency syndrome (AIDS) wasting  
34 syndrome, and cancer chemotherapy-induced nausea and vomiting (10-12). Although researchers  
35 are investigating cannabis for treating cancer, psychiatric disorders (13), sleep disorders (14),  
36 chronic pain (15) and inflammatory conditions such as rheumatoid arthritis (16), there is  
37 currently insufficient evidence to support its clinical use. Scientific studies on emerging  
38 therapeutics typically exclude vulnerable populations such as pregnant women, young people,  
39 the elderly, and those with comorbidities, and those who depend on multiple medications, thus  
40 limiting the availability of evidence for cannabis effectiveness in these population groups (17).

41 Cannabis as medicine is associated with a rapidly expanding industry (18). Patient demand is  
42 increasing, as reflected in an increasing number of approvals for prescriptions over time (19),  
43 with one study showing that 61% of Australian GPs surveyed reported one or more patient  
44 enquiries regarding medical cannabis (20). With this increasing demand, is sophisticated  
45 marketing by medicinal cannabis companies that leverages evidence from a small number of

46 studies to promote their products (21, 22). In light of these development, concerns regarding  
47 patient safety are warranted especially when marketing for cannabinoid products is associated  
48 with inadequate labelling and/or inappropriate dosage recommendations in some cannabis  
49 products (23), the provision of over-the-counter cannabis products that do not require a  
50 prescription (24) and the illicit drug market (25). Given this dynamic interplay between  
51 marketing, product innovation, regulation, and consumer demand new innovative surveillance  
52 methods are required to augment existing established monitoring approaches.

53 Although there is considerable engagement from many stakeholders to improve the scientific  
54 evidence regarding the efficacy and safety of cannabis through randomized control trials, many  
55 gaps remain in the literature (26). However, data from real-world and patient reported data  
56 sources could provide opportunities to address this evidence deficit (27). This real-world data  
57 can be captured from a variety of sources such as found in routinely collected health care and  
58 health services records that include but is not limited to patient generated data from medical,  
59 administrative and claims data as well as patient reported data from surveys, wearable trackers,  
60 patient registries, and social media (28-30).

61 People readily consult the internet when looking for and sharing health information (31, 32).  
62 According to 2017 survey of Health Information National Trends, almost 78% of US adults used  
63 online searches first to inquire about health or medical information (31). Data resulting from  
64 these online activities is labelled ‘user generated’ and is increasingly becoming a component of  
65 surveillance systems in the health data domain (33). Monitoring user-generated data on the web  
66 can be a timely and inexpensive way to generated population-level insights (34). The collective  
67 experiences and opinions shared online are an easily accessible wide-ranging data source for

68 tracking emerging trends – which might be unavailable or less noticeable by other surveillance  
69 systems.

70 The objective of this systematic review is to understand the utility of online user generated text  
71 in providing insight into the use of cannabis as a medicine. In this review, we aim to  
72 systematically review existing work that utilizes user-generated content to explore cannabis as a  
73 medicine. The objective of this systematic review is to synthesise quality primary research that  
74 uses social media discourse and internet search engine queries to answer the following questions:

- 75 • Does online user-generated text provide a useful data source for studying cannabis as a  
76 medicine?
- 77 • What are the research questions motivating the studies of online user-generated text that  
78 discuss medicinal use of cannabis?
- 79 • How can future research leverage user-generated content to study the use of cannabis as a  
80 medicine?

## 81 **Materials and methods**

82 For this systematic review we used a framework for systematic reviews and meta-analyses, the  
83 PRISMA guidelines to inform our methods (35). A manual search of Medline, Embase, Web of  
84 Science, and Scopus databases was independently conducted by SKH in May 2021 and again by  
85 CMH in March 2022. The search was limited to English-language studies that were published  
86 between January 1974 and March 2022. Given that much of the computational research in this  
87 area is published in peer-reviewed computer science venues that are not necessarily indexed by  
88 Medline we also used complementary literature databases (Embase, Web of Science, and  
89 Scopus) to generate our initial list of publications for screening.

90 Literature database queries were developed for four categories of studies. The first three  
91 categories used social media text as a data source, the fourth relied on internet search engine  
92 query data. For the first category, the database queries combined words used to describe social  
93 media forums, and cannabis-related keywords and general medical-related keywords (Table 1  
94 Category 1). The second category also included the social media and cannabis-related keywords,  
95 but used keywords specific to psychiatric disorders, for which the use of medical cannabis has  
96 been described. Our search terms for this second category were informed by a systematic review  
97 of medicinal cannabis for psychiatric disorders (13) (Table 1 Category 2). The third category  
98 included social media and cannabis related keywords but focused on non-psychiatric medical  
99 conditions for which cannabis is sometimes used (Table 1 Category 3). The fourth category  
100 included studies using Internet search engine queries as a data source, there were no medical  
101 conditions included in these searches (Table 1 Category 4).

102 **Table 1. Search Terms**

| <b>Category 1 - Social media, cannabis, and medical terms as keywords</b>                                                                                      |                                                                                                                         |                                                                                                                                                                                                                                                                                                                                                                                                                                                           |
|----------------------------------------------------------------------------------------------------------------------------------------------------------------|-------------------------------------------------------------------------------------------------------------------------|-----------------------------------------------------------------------------------------------------------------------------------------------------------------------------------------------------------------------------------------------------------------------------------------------------------------------------------------------------------------------------------------------------------------------------------------------------------|
| <i>Social media related Keywords</i>                                                                                                                           | <i>Cannabis keywords</i>                                                                                                | <i>Medical keywords</i>                                                                                                                                                                                                                                                                                                                                                                                                                                   |
| "Social media" OR twitter OR reddit OR instagram OR youtube OR pinterest OR facebook OR "social network forum" OR "Online health community" OR "message board" | cannabis OR cannabis OR cannabinoids OR delta-9-tetrahydrocannabinol OR cannabidiol OR cbd OR cbg OR cbn OR the OR weed | medical OR medicinal OR patient OR patients OR medicine OR doctor OR position OR care OR therapy OR therapeutic                                                                                                                                                                                                                                                                                                                                           |
| <b>Category 2 - Social media, cannabis, and psychiatric disorders keywords</b>                                                                                 |                                                                                                                         |                                                                                                                                                                                                                                                                                                                                                                                                                                                           |
| <i>Social media related Keywords</i>                                                                                                                           | <i>Cannabis keywords</i>                                                                                                | <i>Psychiatric disorders</i>                                                                                                                                                                                                                                                                                                                                                                                                                              |
| "Social media" OR twitter OR reddit OR instagram OR youtube OR pinterest OR facebook OR "social network forum" OR "Online health community" OR "message board" | cannabis OR cannabis OR cannabinoids OR delta-9-tetrahydrocannabinol OR cannabidiol OR cbd OR cbg OR cbn OR the OR weed | depression OR depressive OR "mental illness*" OR "mental disorder*" OR "mental health" OR "mood disorder*" OR "affective disorder*" OR anxi* OR "panic disorder" OR "obsessive compulsive" OR adhd OR "attention deficit" OR phobi* OR bipolar OR psychiat* OR psychological OR psychosis OR psychotic OR schizophr* OR "severe mental*" OR "serious mental*" OR antidepress* OR antipsychotic* OR "post traumatic*" OR "personality disorder*" OR stress |
| <b>Category 3 - Social media, cannabis and various medical (non-psychiatric) conditions/ illnesses keywords</b>                                                |                                                                                                                         |                                                                                                                                                                                                                                                                                                                                                                                                                                                           |
| <i>Social media related Keywords</i>                                                                                                                           | <i>Cannabis keywords</i>                                                                                                | <i>Medical conditions</i>                                                                                                                                                                                                                                                                                                                                                                                                                                 |
| "Social media" OR twitter OR reddit OR instagram OR youtube OR pinterest OR facebook OR "social network forum" OR "Online health community" OR "message board" | cannabis OR cannabis OR cannabinoids OR delta-9-tetrahydrocannabinol OR cannabidiol OR cbd OR cbg OR cbn OR the OR weed | Pain, Opioid, Alzheimer, sleep OR insomnia, inflammatory, arthritis, Multiple Sclerosis, Endometriosis                                                                                                                                                                                                                                                                                                                                                    |
| <b>Category 4 - Search engine queries and cannabis keywords</b>                                                                                                |                                                                                                                         |                                                                                                                                                                                                                                                                                                                                                                                                                                                           |
| <i>Search Engine keywords</i>                                                                                                                                  | <i>Cannabis keywords</i>                                                                                                |                                                                                                                                                                                                                                                                                                                                                                                                                                                           |
| "Search engine" OR "search log" OR "search queries" OR "online search" OR "internet Search" OR "web search"                                                    | cannabis OR Cannabis OR Cannabinoids OR Delta-9-Tetrahydrocannabinol OR Cannabidiol OR CBD OR CBG OR CBN OR THC OR weed |                                                                                                                                                                                                                                                                                                                                                                                                                                                           |

103

104 The inclusion criteria for this systematic review were: (i) primary research studies, (ii) studies

105 which used online user-generated text as a data source, and (iii) research that was either directly

106 focused on cannabis and cannabis products that have an impact on health, or were health-related  
107 studies that found medicinal use of cannabis.

108 Exclusion criteria comprised published: (i) editorials, letters, commentaries, and book chapters;  
109 (ii) studies that used social media for recruiting participants; (iii) studies where the full text of the  
110 publication was not available; (iv) studies primarily focused on electronic nicotine delivery  
111 systems adapted to deliver cannabinoids and (v) studies that used bots or autonomous systems as  
112 the main data source and (vi) studies that focused exclusively on synthetic cannabis.

113 Included studies were reviewed by CMH, YB, MC, and SKH. Where initial disagreement existed  
114 between reviewers regarding the inclusion eligibility of a study, team members met to discuss  
115 the disputed article's status until consensus was achieved. For all the articles that met the  
116 inclusion criteria, pairs of reviewers independently critiqued the articles using a checklist  
117 developed for this study. The purpose of the checklist was to provide an overall assessment of  
118 quality rather than generate a specific score, a summary version of this checklist is presented  
119 (S1). Assessments of quality were based on evidence of weakness in aims or objectives, main  
120 findings, data collection method, analytic methods, data source, and evaluation and  
121 interpretations of the study.

122 Studies were excluded if they had: (i) poorly defined objectives; (ii) poorly described  
123 methodology; (iii) inappropriate analytic approach; (iv) small volume of data and/or (v) results  
124 that are not clearly reported).

125 Of the 1,271 titles identified in the electronic database searches, 781 were duplicates and 441  
126 were excluded based on lack of relevance. This screening provided 49 potentially relevant  
127 articles for inclusion. Of these, five were excluded due to full text inaccessibility, and four were



128 excluded based on reasons listed earlier. This provided 40 papers for inclusion in the review. The  
129 PRISMA flow diagram is presented in Fig 1. The PRISAM checklist is reported in S2 Checklist.

130 **Fig 1. The PRISMA flow diagram**

131 **Results**

132 Of the 40 papers synthesized for this review most were journal articles 38/40 (95%), and two  
133 were conference-based publications 2/40 (5%). Table 2 provides a summary of each paper that  
134 includes author names, publication year, data source, duration of the study, number of collected  
135 posts, number of analyzed posts, and the coding/labelling approach used.

136 **Data collection and annotation**

137 Table 2 shows that the largest dataset labelled by the researchers belongs to one of the earliest  
138 studies in this domain, where around 47,000 tweets are manually labelled (36). This paper was  
139 one of 21/40 (53%) of the papers which have either collected a limited number of data points or  
140 have sampled their collected data and manually coded the data to gain an in-depth understanding  
141 of the domain. 4/40 (10%) have used existing meta-data including geo-location data. 2/40 (5%)  
142 have used social media analytics companies' data (37, 38). 13/40 (32%) have used an automated  
143 method for labelling data - these include machine learning, lexicon or rule-based algorithms. The  
144 earliest study that employed an automated labelling method was performed in 2017 (39), which  
145 used machine learning, thereafter the papers show a trend for using automation. The ability of  
146 such automated data-centric (40) approaches to handle more data means they can be utilized to  
147 broaden the available analyses, as more data enables the use of more sophisticated techniques  
148 such as machine learning models. Insights gained from the smaller qualitative studies can be  
149 used to inform the design of automated approaches, and even the manually labelled data can be

150 used for training these models, so in this way automated methods can be built upon and leverage  
 151 initial manual methods.

152 **Table 2. Articles included in the review**

| #  | Study                             | Source                                    | Duration                     | Collected data                                                                        | Annotated/analyzed                                 | Coding/labelling approach                            |
|----|-----------------------------------|-------------------------------------------|------------------------------|---------------------------------------------------------------------------------------|----------------------------------------------------|------------------------------------------------------|
| 1  | McGregor et al., 2014 (41)        | Online forums, Facebook, Twitter, YouTube | Not Available                | 3,785 items                                                                           | All data                                           | Manual coding                                        |
| 2  | Cavazos-Rehg et al., 2015 (42)    | Twitter                                   | Feb 2014 – Mar 2014          | 7,653,738 tweets                                                                      | 7,000 tweets                                       | Manual coding using crowdsourcing services           |
| 3  | Daniulaityte et al., 2015 (43)    | Twitter                                   | Oct 2014– Dec 2014           | 125,255 tweets<br>27,018 geolocated                                                   | All data                                           | No coding - used existing geographical fields        |
| 4  | Gonzalez-Estrada et al., 2015(44) | YouTube                                   | 4-8 June 2014                | 200 most viewed videos                                                                | All data                                           | Manual coding                                        |
| 5  | Krauss et al., 2015(45)           | YouTube                                   | 22 <sup>nd</sup> of Jan 2015 | 116 Videos                                                                            | All data                                           | Manual coding                                        |
| 6  | Thompson et al., 2015 (36)        | Twitter                                   | Mar 2012 – July 2013         | 36,939 original tweets<br>10,000 retweets                                             | ~47,000                                            | Manual coding                                        |
| 7  | Cavazos-Rehg et al., 2016 (46)    | Twitter                                   | Jan 2015                     | 206,854 tweets                                                                        | 5,000                                              | Manual coding using crowdsourcing services           |
| 8  | Lamy et al., 2016 (47)            | Twitter                                   | May 2015 – Jul 2015          | 100,182 tweets<br>26,975 geolocated                                                   | 3,000                                              | Manual coding                                        |
| 9  | Mitchell et al., 2016 (48)        | Online Forums                             | Oct 2014                     | 268 forum threads                                                                     | 46 threads<br>880 posts                            | Manual coding                                        |
| 10 | Andersson et al., 2017 (49)       | Online Forums                             | 18-19 Apr 2016               | 32 topics                                                                             | All data by researchers                            | Manual coding                                        |
| 11 | Dai & Hao, 2017 (39)              | Twitter                                   | Aug 2015 – Apr 2016          | 1,253,872 post traumatic stress disorder (PTSD) tweets<br>66,000 cannabis PTSD tweets | 2,000 labelled, remaining data by machine learning | Automated coding using machine learning              |
| 12 | Greiner et al., 2017 (50)         | Online Forums                             | Nov 2014 – Mar 2015          | 717 posts                                                                             | All data                                           | Manual coding                                        |
| 13 | Turner & Kantardzic, 2017 (51)    | Twitter                                   | Aug 2015 – Apr 2016          | 40,509 geolocated tweets                                                              | 2,000 labelled, remaining data by machine learning | Automated coding using machine learning              |
| 14 | Westmaas et al., 2017 (52)        | Online Forums                             | Jan 2000 – Dec 2013          | 468,000 posts                                                                         | All data                                           | Automated coding using topic modelling               |
| 15 | Yom-Tov & Lev-Ran, 2017 (53)      | Bing search engine                        | Nov 2016 – Apr 2017          | Not available                                                                         | All data                                           | Automated coding using lexicons                      |
| 16 | Cavazos-Rehg et al., 2018 (54)    | YouTube                                   | 10-11 June 2015              | 83 videos                                                                             | All data                                           | Manual coding                                        |
| 17 | Glowacki et al., 2018 (55)        | Twitter                                   | Aug 2016 – Oct 2016          | 73,235 tweets                                                                         | All data                                           | Automated coding using topic modelling               |
| 18 | Meacham et al., 2018 (56)         | Reddit                                    | Jan 2010 – Dec 2016          | ~400,000 posts                                                                        | All data                                           | Automated coding using lexicons and pattern matching |

|    |                                |                             |                            |                                                                                |                                                    |                                                   |
|----|--------------------------------|-----------------------------|----------------------------|--------------------------------------------------------------------------------|----------------------------------------------------|---------------------------------------------------|
| 19 | Leas et al., 2019 (57)         | Google Trends               | Jan 2004 – April 2019      | Not available                                                                  | Summary data                                       | No coding – used Google trends data               |
| 20 | Meacham et al., 2019 (58)      | Reddit                      | Jan 2017– Dec 2017         | 193 dabbling questions and/or posts                                            | All data                                           | Manual coding                                     |
| 21 | Nasralah et al., 2019 (37)     | Twitter                     | Jan 2015 – Feb 2019        | 20,609 tweets                                                                  | All data                                           | Automated coding supplied by an analytics company |
| 22 | Pérez-Pérez et al., 2019 (59)  | Twitter                     | Feb 2018– Aug 2018         | 24,634 tweets                                                                  | All data                                           | Automated coding using lexicons                   |
| 23 | Shi et al., 2019 (60)          | Google Trends, Buzzsumo     | Jan 2011 – Jul 2018        | Not available                                                                  | Summary data                                       | No coding – used Google trends data               |
| 24 | Allem et al., 2020 (61)        | Twitter                     | May 2018– Dec 2018         | 19,081,081 tweets                                                              | 60,861 non-bots<br>8,874 bots                      | Automated coding using rule-based methods         |
| 25 | Janmohamed et al., 2020 (62)   | Blogs, news, forums, others | Aug 2019 – Apr 2021        | 4,027,172 documents                                                            | All data                                           | Automated coding using topic modelling            |
| 26 | Jia et al., 2020 (63)          | Google, YouTube Facebook    | Sep 2019                   | 51 Google websites<br>126 Facebook posts<br>37 YouTube videos                  | All data                                           | Manual coding                                     |
| 27 | Leas et al., 2020 (64)         | Reddit                      | Jan 2014 – Aug 2019        | 104,917                                                                        | 3,000 initial data<br>376 as testimonials          | Manual coding                                     |
| 28 | Merten et al., 2020 (65)       | Pinterest                   | 31 Jul, 18 Aug, 1 Sep 2018 | 1,280                                                                          | 226                                                | Manual coding                                     |
| 29 | Mullins et al., 2020 (38)      | Twitter                     | 22 Jun – 5 Jul 2017        | 941 tweets                                                                     | All data                                           | Automated coding supplied by an analytics company |
| 30 | Saposnik & Huber, 2020 (66)    | Google Trends               | Jan 2004 – Dec 2019        | Not available                                                                  | Summary data                                       | No coding – used Google trends data               |
| 31 | Song et al., 2020 (67)         | GoFundMe                    | Jan 2012 – Dec 2019        | 1,474 campaigns                                                                | 500 campaigns                                      | Manual coding                                     |
| 32 | Tran & Kavuluru, 2020 (68)     | Reddit & FDA comments       | Jan 2019– April 2019       | 64,099 reddit comments<br>3,832 FDA (U.S. Food & Drug Administration) comments | All data                                           | Automated coding using rule-based methods         |
| 33 | van Draanen et al., 2020 (69)  | Twitter                     | Jan 2017 – June 2019       | 1,200,127 tweets                                                               | All data                                           | Automated coding using Topic modelling            |
| 34 | Zenone et al., 2020 (70)       | GoFundMe                    | Jan 2017 – May 2019        | 155 campaigns                                                                  | All data                                           | Manual coding                                     |
| 35 | Pang et al., 2021 (71)         | Twitter                     | Dec 2019 – Dec 2020        | 17,238 tweets                                                                  | 1,000 tweets                                       | Manual coding                                     |
| 36 | Rhidenour et al., 2021 (72)    | Reddit                      | Jan 2008 – Dec 2018        | 974 posts                                                                      | All data                                           | Manual coding                                     |
| 37 | Smolev et al., 2021 (73)       | Facebook                    | Nov 2018 – Nov 2019        | 7,694 posts                                                                    | All data                                           | Manual coding                                     |
| 38 | Zenone et al., 2021 (74)       | GoFundMe                    | Jun 2017 – May 2019        | 164 campaigns                                                                  | All data                                           | Manual coding                                     |
| 39 | Soleymanpour et al., 2021 (75) | Twitter                     | July 2019                  | 2,200,000 tweets                                                               | 2,000 labelled, remaining data by machine learning | Automated coding using machine learning           |
| 40 | Allem et al. 2022 (76)         | Twitter                     | Jan – Sep 2020             | 353,353 tweets                                                                 | 1,092 labelled, remaining data by classifiers      | Automated coding using rule-based methods         |

## 153 **Data analysis**

154 Most of the manually labelled studies focused on manual or statistical analysis (36, 41, 42, 46-  
155 50, 58, 63-65, 67, 70-74), while three analyzed online videos (44, 45, 54). Studies that utilized a  
156 large volume of data allowed for the use of computational methods, including sentiment analysis,  
157 topic modeling, and rule-based text mining. Sentiment analysis aims to analyse people's  
158 sentiments, opinions, and attitudes (75, 77). Topic modelling is a machine learning method for  
159 automatically discovering common themes in a collection of documents (75, 78). Rule-based text  
160 mining involves classification of posts into pre-existing health-related categories (76). Studies  
161 also explored social network analysis, which examines how social media users connect through  
162 friendship, sending links and information, or tagging and following (79).

## 163 **Research Themes**

164 In this review, we categorized 40 research articles related to user-generated online text (social  
165 media discourse and internet search engine queries) into six broad themes. The themes are  
166 centered around the research questions motivating the studies.

### 167 **General cannabis-related**

168 Nine studies were included in this theme (Table 3). The main keywords used in these studies  
169 included general terms such as 'cannabis', 'marijuana', 'pot' and 'weed'. The major aim of these  
170 studies was to either identify topics of conversations regarding cannabis, or to examine their  
171 sentiments. These studies are included because they reported on conversations around cannabis  
172 use for medical purposes, or sentiment associated with perceptions of health benefits of cannabis  
173 and reports of adverse effects. For example, a study on veterans use of cannabis found that  
174 cannabis is used to self-medicate a number of health issues, including Post-Traumatic Stress

175 Disorder (PTSD), anxiety and sleep disorder (72). Six of the studies used Twitter as a data source  
 176 (36, 42, 51, 61, 69, 76), one studied content of YouTube videos about cannabis (54), one  
 177 investigated online self-help forums (50) and another used Reddit (72).

178 **Table 3. Theme of papers studying general conversations**

| Study                          | Aim                                                                                                                                                                                                                            | Health-related effects/claims                                                                                                                                                                                                                                                                                                                        | Data identification                                  |
|--------------------------------|--------------------------------------------------------------------------------------------------------------------------------------------------------------------------------------------------------------------------------|------------------------------------------------------------------------------------------------------------------------------------------------------------------------------------------------------------------------------------------------------------------------------------------------------------------------------------------------------|------------------------------------------------------|
| Cavazos-Rehg et al., 2015 (42) | To examine the sentiment and themes of cannabis-related tweets from influential users and to describe the users' demographics.                                                                                                 | A common theme of pro tweets was that cannabis has health benefits. Anti-cannabis posts spoke of the harm experienced in using cannabis. 77% of posts had positive sentiments, with 12 times higher reach than other posts.                                                                                                                          | Cannabis-related keyword                             |
| Thompson et al., 2015 (36)     | To examine cannabis-related content in Twitter, especially content tweeted by adolescent users, and to examine any differences in message content before and after the legalization of recreational cannabis in two US states. | More tweets described perceived positive benefits of cannabis use, including relaxation and escaping life problems. Tweets described cannabis as less harmful than other drugs or as not harmful at all, and suggested its medical role for conditions such as depression and cancer. Less than 1% of tweets expressed a concern about cannabis use. | Cannabis-related keyword                             |
| Greiner et al., 2017 (50)      | To investigate online content of cannabis use/addiction self-help forums.                                                                                                                                                      | Self-help forums on cannabis share a theme around cannabis users seeking help for addiction and withdrawal issues.                                                                                                                                                                                                                                   | keywords "cannabis" and "forum" and "help"           |
| Turner et al., 2017 (51)       | To examine if cannabis legalization policies impact Twitter conversations and the social networks of users contributing to cannabis conversations.                                                                             | Medical cannabis was a major topic in the conversations.                                                                                                                                                                                                                                                                                             | Cannabis-related keywords                            |
| Cavazos-Rehg et al., 2018 (54) | To investigate cannabis product reviews and the relationship between exposure to product reviews and cannabis users' demographics and characteristics.                                                                         | Product reviews promoted cannabis for helping with relaxation, pain relief, sleep, improving emotional well-being. Medical cannabis users are more likely to be exposed to cannabis product reviews.                                                                                                                                                 | "weed review", "marijuana review", "cannabis review" |
| Allem et al., 2020 (80)        | To identify and describe cannabis-related topics of conversation on Twitter, and the public health implications of these.                                                                                                      | Health and medical was the third most prevalent topic of the 12 topics identified in the data. Posts suggested that cannabis could help with cancer, sleep, pain, anxiety, depression, trauma, and posttraumatic stress disorder. Health-related posts from social bots were almost double of genuine posts.                                         | Cannabis-related keywords                            |

|                               |                                                                                                                                                    |                                                                                                                                                                                                                                                    |                                                                                                     |
|-------------------------------|----------------------------------------------------------------------------------------------------------------------------------------------------|----------------------------------------------------------------------------------------------------------------------------------------------------------------------------------------------------------------------------------------------------|-----------------------------------------------------------------------------------------------------|
| Van Draanen et al., 2020 (69) | To examine differences in the sentiment and content of cannabis-related tweets in the US (by state cannabis laws) and Canada.                      | Medical cannabis use was one of the main topics of conversations in cannabis-related tweets from both countries.                                                                                                                                   | Tweets filtered on US and Canada geolocation and then further filtered on cannabis-related keywords |
| Rhidenour et al., 2021 (72)   | To explore Veterans' Reddit discussions regarding their cannabis use.                                                                              | Over a third of the Reddit posts described the use of medical cannabis as an aid for psychological and physical ailments. Overall, veterans discussed how the use of medical cannabis reduced PTSD symptoms, anxiety, and helped with their sleep. | The veteran subreddit                                                                               |
| Allem et al., 2022 (76)       | To determine the extent to which a medical dictionary could identify cannabis-related motivations for use and health consequences of cannabis use. | There were posts related to both health motivations and consequences of cannabis use. The health-related posts included issues with the respiratory system, stress to the immune system, and gastrointestinal issues, among others.                | Cannabis-related keywords                                                                           |

179

## 180 Cannabis mode of use

181 Seven studies reported on the use of cannabis as a medicine in relation to its mode of use (Table  
 182 4). These studies collected data using keywords such as 'vape', 'vaping', 'dabbing' and  
 183 'edibles'. Conversations around modes of use revealed a theme about lacking, seeking, or  
 184 sharing knowledge about possible health consequences of the modes of use. Another theme was  
 185 around the perceived health benefits of various modes of use including sleep improvement and  
 186 relaxation resulting from dabbing oils (46) or consuming 'edibles' (47). The findings suggest that  
 187 for emerging modes of use such as dabbing, where the availability of evidence-based information  
 188 is limited, people seek information from others' experiences.

### 189 Table 4. Theme of papers studying mode of use

| Study                          | Aim                                                                                                                                            | Health-related effects/claims                                                                                                                                                          | Data identification                    |
|--------------------------------|------------------------------------------------------------------------------------------------------------------------------------------------|----------------------------------------------------------------------------------------------------------------------------------------------------------------------------------------|----------------------------------------|
| Daniulaityte et al., 2015 (43) | To explore Twitter data on concentrate ('dabs') use and examine the impact of cannabis legalization policies on concentrate use conversations. | Twitter data suggest popularity of dabs in the US states with legalized recreational/medical use of cannabis. Dabbing as an emerging mode of use could carry significant health risks. | dab-related keywords for U.S. location |

|                                |                                                                                                                                              |                                                                                                                                                                                                                                                                                                                                                                           |                                                        |
|--------------------------------|----------------------------------------------------------------------------------------------------------------------------------------------|---------------------------------------------------------------------------------------------------------------------------------------------------------------------------------------------------------------------------------------------------------------------------------------------------------------------------------------------------------------------------|--------------------------------------------------------|
| Krauss et al., 2015 (45)       | To explore the content of cannabis dabbing-related videos on YouTube.                                                                        | Only 21% of videos contained some warning about dabbing, such as preventing explosions, injury, or negative side effects. 22% of videos specifically mentioned medical cannabis or getting “medicated”, either in the video itself or in the accompanying text description.                                                                                               | Dabbing related keywords                               |
| Cavazos-Rehg et al., 2016 (46) | To study themes of dabbing conversations and to investigate the consequences of high-potency cannabis consumption.                           | 4th theme (of 7 themes) was about cannabis helping with relaxation, sleep or solving problems. Extreme effects were both physiological and psychological. The most common physiologic effects were passing out and respiratory, with coughing the most common respiratory effect.                                                                                         | Dabbing related keywords                               |
| Lamy et al., 2016 (47)         | To study themes of edibles conversations and examine legalization policies’ impact on cannabis-related tweeting activity.                    | Twitter data suggest mostly positive attitudes toward cannabis edibles. Positive tweets describe the quality of the “high” experienced and how cannabis edibles facilitate falling asleep. Negative tweets discuss the unreliability of edibles’ THC dosage and delayed effects that were linked to over-consumption, which could lead to potential harmful consequences. | Cannabis edible-related keywords                       |
| Meacham et al., 2018 (56)      | To analyse discussions of emerging and traditional forms of cannabis use.                                                                    | Less than 2% of conversations described adverse effects. The most mentioned adverse effects were anxiety-related in the context of smoking, edibles, and butane hash oil, and “cough” for vaping and dabbing.                                                                                                                                                             | A cannabis specific subreddit on various modes of use  |
| Meacham et al., 2019 (58)      | To study themes of dabbing-related questions and responses.                                                                                  | Health concerns are the 5th category of dabbing questions - including respiratory effects, anxiety, and vomiting. Respondents in these conversations usually spoke from personal experience.                                                                                                                                                                              | Search for “Dab” and “question” on cannabis subreddits |
| Janmohamed et al., 2020 (62)   | To map temporal trends in the web-based vaping narrative, to indicate how the narrative changed from before to during the COVID-19 pandemic. | The emergence of a vape-administered CBD treatment narrative around the COVID-19 pandemic.                                                                                                                                                                                                                                                                                | Vape-related keywords                                  |

190

## 191 **Cannabis as a medicine for a specific health issue**

192 Six studies were included in this theme (Table 5). These studies investigated conversations

193 around the use of cannabis or cannabidiol for a specific health issue. The health conditions

194 included glaucoma (63), PTSD (39), cancer (60, 70), Attention Deficit Hyperactivity Disorder

195 (ADHD) (48) and pregnancy (71). These studies mostly discovered that conversations claimed  
 196 benefits of cannabis as an alternative treatment for these health conditions, although mentions of  
 197 harm, and both harm and therapeutic effects, were also present (48).

198 **Table 5. Theme of papers studying specific health issues**

| Study                      | Aim                                                                                                                                                                                          | Health-related effects/claims                                                                                                                                                                                                                                                                                                                                                                                 | Data identification                       |
|----------------------------|----------------------------------------------------------------------------------------------------------------------------------------------------------------------------------------------|---------------------------------------------------------------------------------------------------------------------------------------------------------------------------------------------------------------------------------------------------------------------------------------------------------------------------------------------------------------------------------------------------------------|-------------------------------------------|
| Mitchell et al., 2016 (48) | To examine the content of online forum threads on ADHD and cannabis use to identify trends about their relation, particularly regarding therapeutic and adverse effects of cannabis on ADHD. | 25% of individual posts indicated that cannabis is therapeutic for ADHD, as opposed to 8% that claim it is harmful, 5% that it is both therapeutic and harmful, and 2% that it has no effect on ADHD.                                                                                                                                                                                                         | Cannabis and ADHD keywords                |
| Dai & Hao, 2017 (39)       | To evaluate factors that could impact public attitudes to PTSD related cannabis use.                                                                                                         | 5.3% of all PTSD tweets were related to cannabis use and these tweets predominantly supported cannabis use for PTSD.                                                                                                                                                                                                                                                                                          | Cannabis and PTSD keywords                |
| Shi et al., 2019 (60)      | To characterize trends in use of cannabis for cancer and analysis of content and impact of popular news about cannabis for cancer.                                                           | Between 2011-2018, the relative google search volume of 'cannabis cancer' queries increased at a rate 10 times faster than 'standard cancer therapies' queries. Popular 'false news' stories had a much higher engagement than contrary 'accurate' news stories.                                                                                                                                              | Cannabis vs standard therapies for cancer |
| Jia et al., 2020 (63)      | To analyze the content quality and risk of readily available online information regarding cannabis and glaucoma.                                                                             | While the American Glaucoma Society recommends against cannabis use for glaucoma treatment, 21% of Facebook, 24% of Google, and 59% of YouTube search results were pro cannabis use for glaucoma treatment.                                                                                                                                                                                                   | Cannabis and Glaucoma keywords            |
| Zenone et al., 2020 (70)   | To use crowdfunding campaigns to understand how cannabidiol is represented/misrepresented as a cancer-related care.                                                                          | CBD use was reported to reduce the side effects of conventional treatments or can be used with other complementary cancer treatments. Reported uses included stimulating appetite, general pain relief, assisting with sleep, countering nausea, or general recovery purposes. Most campaigners presented definite efficacy of CBD for pain or symptom management.                                            | CBD term variants and "cancer"            |
| Pang et al., 2021 (71)     | To examine cannabis and pregnancy-related tweets over a 12-month period.                                                                                                                     | 36% mentioned safety during pregnancy, 2.3% of posts asked about safety during postpartum, and 2.7% of posts expressed use of cannabis during pregnancy to help with pregnancy symptom i.e. to help with morning sickness, nausea, vomiting, headaches, pain, stress, and fatigue. The authors conclude that health providers discuss risks and provide official information about cannabis use in pregnancy. | Cannabis and pregnancy related keywords   |

199

200



201 **Cannabis as a medicine as part of discourse on illness and disease**

202 Eleven studies were included in this theme. In this category, the research focus was on social  
 203 media topics relating to management and treatment options for a range of health conditions  
 204 rather than on medicinal cannabis per se (Table 6). There were eleven studies, and the health  
 205 conditions included inflammatory and irritable bowel disease(59), opioid use disorder (37, 55),  
 206 pain (38), ophthalmic disease (41), cluster headache and migraine(49), asthma (44), cancer (52,  
 207 67), autism disorder (66) and brachial plexus injury (73).

208 **Table 6. Theme of papers studying illness and disease discourse**

| Study                              | Aim                                                                                                                                   | Health-related effects/claims                                                                                                                                                                                                                                                                                                      | Data identification                                                           |
|------------------------------------|---------------------------------------------------------------------------------------------------------------------------------------|------------------------------------------------------------------------------------------------------------------------------------------------------------------------------------------------------------------------------------------------------------------------------------------------------------------------------------|-------------------------------------------------------------------------------|
| McGregor et al., 2014 (41)         | To analyse the ophthalmic content of social media platforms.                                                                          | Treatment was one of the main themes, with complementary therapy featuring most prominently on Twitter, where 87% of posts on complementary therapy described the use of medical cannabis for glaucoma.                                                                                                                            | Glaucoma patient forums and glaucoma keywords                                 |
| Gonzalez-Estrada et al., 2015 (44) | To determine the educational quality of YouTube videos for asthma.                                                                    | The most common video content was regarding alternative medicine (38%), and included cannabis as well as live fish ingestion; salt inhalers; raw food, vegan, gluten-free diets; yoga; Ayurveda; reflexology; acupressure; and acupuncture; and Buteyko breathing.                                                                 | Asthma related videos                                                         |
| Andersson et al., 2017 (49)        | To understand the use of non-established or alternative pharmacological treatments used to alleviate cluster headaches and migraines. | Cannabis was discussed for its potential to alleviate symptoms or reduce the frequency of migraine attacks. Some had used cannabis for other purposes but experienced additional benefits for headaches. The effects of self-treatment with cannabis appeared more contradictory and complex than treatment with other substances. | Search for “treatment migraines” on three alternative treatment online forums |
| Westmaas et al., 2017 (52)         | To investigate contexts in which smoking or quitting is discussed in a cancer survivor network.                                       | Use of cannabis (primarily for nausea), was the 4th topic.                                                                                                                                                                                                                                                                         | Smoking/cessation-related keywords from the Cancer Survivors Network (CSN)    |

|                               |                                                                                                                                               |                                                                                                                                                                                                                                                        |                                                                                                                                                       |
|-------------------------------|-----------------------------------------------------------------------------------------------------------------------------------------------|--------------------------------------------------------------------------------------------------------------------------------------------------------------------------------------------------------------------------------------------------------|-------------------------------------------------------------------------------------------------------------------------------------------------------|
| Glowacki et al., 2018 (55)    | To identify public reactions to the opioid epidemic by identifying the most popular topics.                                                   | Mentions of cannabis as an effective alternate to opioids for managing pain.                                                                                                                                                                           | Opioid-related keywords                                                                                                                               |
| Nasrallah et al., 2019 (37)   | To understand the concerns of opioid-addicted users.                                                                                          | Cannabis was found in two of five main themes: "In recovery" and "taking illicit drugs" for pain management.                                                                                                                                           | Users who self-identified as addicted to, or previously addicted to, opioids                                                                          |
| Pérez-Pérez et al., 2019 (59) | To characterize the bowel disease community on Twitter.                                                                                       | Medical cannabis was the 4th most mentioned term in the bowel disease (BD) community. Medical cannabis and its components was the most discussed drug, with mentions of its benefits in mitigating common BD symptoms.                                 | Inflammatory bowel disease, Irritable bowel disease keywords                                                                                          |
| Mullins et al., 2020 (38)     | To examine pain-related tweets in Ireland over a 2-week period.                                                                               | The 4th most occurring keyword was cannabis. 90% of Cannabis related tweets were non-personal, with highly positive sentiment and highest number of impressions per tweet. Cannabis had by the largest number of tweets aimed at generating awareness. | Pain-related keywords                                                                                                                                 |
| Saposnik & Huber, 2020 (66)   | To analyse of trends in web searches for the cause and treatments of autism spectrum disorder (ASD).                                          | ASD and cannabis web searches have continued to rise since 2009. Apart from searches on Applied Behavioral Analysis and Autism, cannabis and ASD have been searched more than other ASD interventions since 2013.                                      | "Autism" and key search terms for causes and treatments of autism                                                                                     |
| Song et al., 2020 (67)        | To understand the cancer patient's perspective for using complementary and alternative medicine, or for declining traditional cancer therapy. | Cannabidiol oil was 10th amongst the most used alternative treatments.                                                                                                                                                                                 | 20 most prevalent cancers in the U.S. and a list of top most utilized complementary and alternative medicine including yoga, herbal, meditation, etc. |
| Smolev et al., 2021 (73)      | To analyse themes of brachial plexus injury Facebook conversations.                                                                           | There were 313 posts regarding cannabinoids as a preferred alternative pain management medication.                                                                                                                                                     | "traumatic brachial plexus injury" keyword                                                                                                            |

209

## 210 **Cannabidiol (CBD)**

211 There were six studies in the cannabidiol (CBD) category (57, 64, 65, 68, 74, 75). These studies  
 212 concentrated on conversations related to the benefits of CBD products, product sentiment  
 213 (positive, negative, or neutral), the factors that impact on a person's decision to use CBD  
 214 products, and the trends in therapeutic use of CBD.

215 **Table 7. Theme of papers studying CBD**

| Study                          | Aim                                                                                                    | Health-related effects/claims                                                                                                                                                                                                                                                                                                                                                               | Data identification                                                             |
|--------------------------------|--------------------------------------------------------------------------------------------------------|---------------------------------------------------------------------------------------------------------------------------------------------------------------------------------------------------------------------------------------------------------------------------------------------------------------------------------------------------------------------------------------------|---------------------------------------------------------------------------------|
| Merten et al., 2020 (65)       | To analyse how CBD is portrayed on Pinterest.                                                          | Most pins (57.5%) did not make a specific health benefit claim yet 42.5% claimed mental, physical, or both mental and physical health benefits.                                                                                                                                                                                                                                             | 'cannabidiol' or 'CBD'                                                          |
| Zenone et al., 2021 (74)       | To analyse the CBD informational pathways which bring consumers to CBD for medical purposes.           | Self-directed research was the most common pathway to CBD. The proposed uses of CBD were for cancer, seizure-inducing diseases/conditions, joint/inflammatory diseases, mental health disorders, nervous system diseases, and autoimmune diseases.                                                                                                                                          | 'cannabidiol' or 'CBD'                                                          |
| Leas et al., 2019 (57)         | To analyse public interest trends in CBD using Google Trends.                                          | Searches for CBD exceed searches for yoga and around half as much as searches for dieting.                                                                                                                                                                                                                                                                                                  | 'cannabidiol' or 'CBD' vs other alternative medicine including diet, yoga, etc. |
| Leas et al., 2020 (64)         | To assess if individuals are using CBD for diagnosable conditions which have evidence-based therapies. | Psychiatric conditions were the most commonly cited diagnosable condition, mentioned in 63.9% of testimonials. The second most cited subcategory was orthopedic conditions (26.4%), followed by sleep (14.6%), neurological (6.9%), and gastroenterological (3.9%) conditions.                                                                                                              | CBD subreddit posts                                                             |
| Tran & Kavuluru, 2020 (68)     | To examine social media data to determine perceived remedial effects and usage patterns for CBD.       | Anxiety disorders and pain were the two conditions dominating much of the discussion surrounding CBD, both in terms of general discussion and for CBD as a perceived therapeutic treatment. CBD is mentioned as a treatment for mental issues (anxiety, depression, stress) and physiological issues (pain, inflammation, headache, sleep disorder, seizure disorders, nausea, and cancer). | CBD subreddit posts                                                             |
| Soleymanpour et al., 2021 (75) | To perform content analysis of marketing claims for CBD in Twitter.                                    | Over 50% of CBD tweets appear to be marketing related chatter. Pain and anxiety are the most popular conditions mentioned in marketing messages. Edibles are the most popular product type being advertised, followed by oils.                                                                                                                                                              | "cbd", "cbdoil" and "cannabidiol"                                               |

216

217 **Adverse drug reactions and adverse effects**

218 One study focused explicitly on adverse reaction detection (Table 8) This study explored the  
 219 prevalence of internet search engine queries relating to the topic of adverse reactions and

220 cannabis use. Mentions of adverse effects of cannabis consumption were found in eight studies,  
221 these included respiratory effects and anxiety (56, 58, 76), addiction and withdrawal syndromes  
222 (50), neurological harm (76), harm in pregnancy (71, 76) and general harm (45, 46, 48, 76).

223 **Table 8. Theme of papers studying reactions and adverse effects**

| Study                        | Aim                                                                                        | Health-related effects/claims                                                                                                                                                                                                                                                           | Data identification       |
|------------------------------|--------------------------------------------------------------------------------------------|-----------------------------------------------------------------------------------------------------------------------------------------------------------------------------------------------------------------------------------------------------------------------------------------|---------------------------|
| Yom-Tov & Lev-Ran, 2017 (53) | To check if search engine queries can be used to detect adverse reactions of cannabis use. | A high correlation between the side effects recorded on established reporting systems and those found in the search engine queries. These side effects included anxiety, depression-related symptoms, psychotic symptoms such as paranoia and hallucinations, cough and other symptoms. | Cannabis related keywords |

224

## 225 Discussion

226 Currently, there exist systematic reviews of cannabis and cannabinoids for medical use based on  
227 clinical efficacy outcomes from randomized clinical trials (15) and reviews on the use of social  
228 media for illicit drug surveillance (81). However, to our knowledge, this paper constitutes the  
229 first systematic review examining studies that used user-generated online text to understand the  
230 use of cannabis as a medicine in the global community.

231 Our systematic review found that the use of social media and internet search queries to  
232 investigate cannabis as a medicine is a rapidly emerging area of research. Over half of the studies  
233 included in this review were published within the last three years, this reflects not only increase  
234 community interest in the therapeutic potential of cannabinoids, but also world-wide trends  
235 towards cannabis legalization (4, 82-86). Regarding social media platforms, Twitter was the data  
236 source in seventeen (42.5%) of the 40 studies, almost three and a half times the number of  
237 studies using Reddit (5, 12.5%) and just under three times the number of studies using data from

238 Online forums (6, 15%). Three (7.5%) GoFundMe studies and three (7.5%) Google Trends  
239 studies were also included in the review. Hence, much of the data in this systematic review  
240 comprised posts from the Twitter platform. Several factors may explain this finding, firstly  
241 Twitter is real-time in nature, it has a high volume of messages, and it is publicly accessible.  
242 These factors makes it a useful data source for public health surveillance (87).

243 Regarding the subjects of the studies, eleven (29%) focused on general user-generated content  
244 regarding the treatment of health conditions (glaucoma, autism, asthma, cancer, bowel disease,  
245 brachial plexus injury, cluster headaches, opioid disorder). These studies were not explicitly  
246 designed to investigate cannabis as a medicine, yet they generated results that incidentally found  
247 cannabis mentioned as an alternative or complimentary treatment, either formally prescribed or  
248 via self-medication.

249 Qualitative studies feature prominently in the research, but while their contribution is valuable,  
250 especially in the context of hypothesis generation, they tend to be limited by their smaller  
251 datasets, which frequently comprised manually annotated samples. The recent emergence of  
252 powerful machine learning-based natural language processing (NLP) models suggests that it  
253 should be possible to automate the continuous processing of far larger datasets using NLP  
254 technologies, built upon the insights gained from initial qualitative studies, and even leveraging  
255 their annotated data for training purposes. Recent trends in the social science data landscape have  
256 shown a convergence between social science and computer science expertise, where the ability to  
257 use computational methods has greatly assisted the collection and validation of robust datasets  
258 that can form the basis of deeper social science research (88).

259 We found much heterogeneity in approaches applied to analyse user-related content, and  
260 inconsistent quality in the methodologies adopted. While we endeavored to include as many

261 studies as possible, some of the publications initially identified as suitable for inclusion were not  
262 suitable based on a minimum quality requirements checklist (S1). This checklist was designed to  
263 ensure that selection of data source, choice of platform, data acquisition and preparation, analysis  
264 and evaluation delivers data and conclusions that are appropriate for answering the research  
265 questions.

266 The utilization of user-generated content for health research is subject to several inherent  
267 limitations which include the lack of control that researchers have in relation to the credibility of  
268 information, the frequently unknown demographic characteristics and geographical location of  
269 individuals generating content, and the fact that social media users are not necessarily  
270 representative of the wider community (89). Furthermore, the uniqueness, volume, and salience  
271 of social media data has implications that need to be considered when used for health  
272 information analysis (90). Volume is usually inversely related to salience: a platform such as  
273 Twitter has a very high volume of information, but, apart from its frequency, much of which is  
274 not highly pertinent for analyzing an effect; whereas the volume of information contained in a  
275 blog will much less but likely more salient for analysis. Notwithstanding these limitations, user-  
276 generated content comprises large-scale data that provides access to the unprompted organic  
277 opinions and attitudes of cannabis users in their own words, and is an effective medium through  
278 which to gauge public sentiment. To date, insights regarding cannabis as medicine have gained  
279 primarily through surveys or focus groups which have their own limitations regarding the format  
280 of data collection and potential bias in participant recruitment.

## 281 **Conclusion**

282 This systematic review has shown that user-generated content as a data source for studying  
283 cannabis as a medicine is a growing area worthy of investigation given that it provides another  
284 means to understand how cannabis is being used and perceived by the community. As such, it is  
285 another potential ‘tool’ with which to engage in pharmacovigilance of, not only cannabis as a  
286 medicine, but also other novel therapeutics as they enter the market.

## 287 **Acknowledgments**

288 This systematic review was supported by the Australian Centre for Cannabinoid Clinical and  
289 Research Excellence (ACRE), funded by the National Health and Medical Research Council  
290 (NHMRC) through the Centre of Research Excellence scheme (NHMRC CRE APP1135054).

## 291 **References**

- 292 1. Russo EB. History of cannabis and its preparations in saga, science, and sobriquet.  
293 *Chemistry and Biodiversity*. 2007;4(8):1614-48.
- 294 2. Bridgeman MB, Abazia DT. Medicinal cannabis: history, pharmacology, and implications  
295 for the acute care setting. *Pharmacy and therapeutics*. 2017;42(3):180-.
- 296 3. Grinspoon L, Bakalar JB. *Marihuana: the forbidden medicine*. New Haven, USA: Yale  
297 University Press; 1993.
- 298 4. Kalant H. Medicinal use of cannabis: history and current status. *Pain Research and*  
299 *Management*. 2001;6(2):80-91.
- 300 5. Taylor S. Medicalizing cannabis—Science, medicine and policy, 1950–2004: An overview  
301 of a work in progress. *Drugs: education, prevention and policy*. 2008;15(5):462-74.
- 302 6. Musto DF. The marihuana tax act of 1937. *Archives of General Psychiatry*.  
303 1972;26(2):101-8.
- 304 7. National Academies of S, Medicine E. *The health effects of cannabis and cannabinoids: the current state of evidence and recommendations for research*. 2017.
- 305 8. Hall W. *Medical use of cannabis and cannabinoids: questions and answers for*  
306 *policymaking*. 2018.
- 307 9. Aguilar S, Gutiérrez V, Sánchez L, Nougier M. Medicinal cannabis policies and practices  
308 around the world. *International Drug Policy Consortium*. 2018(April):32-.
- 309

- 310 10. TGA. Access to medicinal cannabis products Canberra, Australia: Therapeutic Goods  
311 Administration 2021 [Available from: Retrieved September, 2021, from  
312 <https://www.tga.gov.au/access-medicinal-cannabis-products-1>
- 313 11. National Academies of Sciences Eam. The health effects of cannabis and cannabinoids:  
314 the current state of evidence and recommendations for research. 2017.
- 315 12. Pearlson G. Medical marijuana and clinical trials. *Weed Science: Cannabis Controversies*  
316 and Challenges Academic Press; 2020. p. 243-60.
- 317 13. Sarris J, Sinclair J, Karamacoska D, Davidson M, Firth J. Medicinal cannabis for psychiatric  
318 disorders: A clinically-focused systematic review. *BMC Psychiatry*. 2020;20(1):1-14.
- 319 14. Suraev AS, Marshall NS, Vandrey R, McCartney D, Benson MJ, McGregor IS, et al.  
320 Cannabinoid therapies in the management of sleep disorders: A systematic review of preclinical  
321 and clinical studies. *Sleep Medicine Reviews*. 2020;53:101339-.
- 322 15. Whiting PF, Wolff RF, Deshpande S, Di Nisio M, Duffy S, Hernandez AV, et al.  
323 Cannabinoids for medical use: A systematic review and meta-analysis. *JAMA - Journal of the*  
324 *American Medical Association*. 2015;313(24):2456-73.
- 325 16. Schulze-Schiappacasse C, Durán J, Bravo-Jeria R, Verdugo-Paiva F, Morel M, Rada G. Are  
326 Cannabis, Cannabis-Derived Products, and Synthetic Cannabinoids a Therapeutic Tool for  
327 Rheumatoid Arthritis? A Friendly Summary of the Body of Evidence. *JCR: Journal of Clinical*  
328 *Rheumatology*. 2021;Publish Ah(00):1-5.
- 329 17. Bonomo Y, Souza JDS, Jackson A, Crippa JAS, Solowij N. Clinical issues in cannabis use.  
330 *British Journal of Clinical Pharmacology*. 2018;84(11):2495-8.
- 331 18. Owens B. The professionalization of cannabis growing. *Nature*. 2019;572(7771).
- 332 19. Hallinan CM, Gunn JM, Bonomo YA. The Rise and Rise of Medicinal Cannabis: An  
333 Interrupted Segmented Regression Time Series Analysis of Australian Medicinal Cannabis  
334 Prescribing Data 2017-2021. *The Medical Journal of Australia* 2021;mja21.00965.
- 335 20. Karanges EA, Suraev A, Elias N, Manocha R, McGregor IS. Knowledge and attitudes of  
336 Australian general practitioners towards medicinal cannabis: a cross-sectional survey. *British*  
337 *Medical Journal Open*. 2018;8(7):e022101.
- 338 21. Caputi TL. The medical marijuana industry and the use of “research as marketing”.  
339 *American Journal of Public Health*. 2020;110(2):174-5.
- 340 22. Ayers JW, Caputi TL, Leas EC. The need for federal regulation of marijuana marketing.  
341 *Jama*. 2019;321(22):2163-4.
- 342 23. Bonn-Miller MO, Loflin MJE, Thomas BF, Marcu JP, Hyke T, Vandrey R. Labeling accuracy  
343 of cannabidiol extracts sold online. *JAMA - Journal of the American Medical Association*.  
344 2017;318(17):1708-9.
- 345 24. Hallinan CM, Eden E, Graham M, Greenwood LM, Mills J, Popat A, et al. Over the  
346 counter low-dose cannabidiol: A viewpoint from the ACRE Capacity Building Group. *Journal of*  
347 *Psychopharmacology*. 2021.
- 348 25. Fitzcharles MA, Shir Y, Häuser W. Medical cannabis: Strengthening evidence in the face  
349 of hype and public pressure. *Cmaj*. 2019;191(33):E907-E8.
- 350 26. Freeman TP, Hindocha C, Green SF, Bloomfield MAP. Medicinal use of cannabis based  
351 products and cannabinoids. *BMJ (Online)*. 2019;365(April):1-7.
- 352 27. Graham M, Martin JH, Lucas CJ, Hall W. Translational hurdles with cannabis medicines.  
353 2020(December 2019):1325-30.



- 354 28. US Food and Drug Administration. Framework for FDA's real world evidence program.  
355 2018.
- 356 29. Nabhan C, Klink A, Prasad V. Real-world Evidence - What Does It Really Mean? JAMA  
357 Oncology. 2019;5(6):2019-21.
- 358 30. Hallinan CM, Gunn JM, Bonomo YA. Implementation of medicinal cannabis in Australia:  
359 Innovation or upheaval? Perspectives from physicians as key informants, a qualitative analysis.  
360 BMJ Open. 2021;11(10):1-12.
- 361 31. Finney Rutten LJ, Blake KD, Greenberg-Worisek AJ, Allen SV, Moser RP, Hesse BW.  
362 Online Health Information Seeking Among US Adults: Measuring Progress Toward a Healthy  
363 People 2020 Objective. Public Health Reports. 2019;134(6):617-25.
- 364 32. Gualtieri LN. The doctor as the second opinion and the internet as the first. 2009. p.  
365 2489-98.
- 366 33. Shakeri Hossein Abad Z, Kline A, Sultana M, Noaen M, Nurmambetova E, Lucini F, et al.  
367 Digital public health surveillance: a systematic scoping review. npj Digital Medicine.  
368 2021;4(1):41.
- 369 34. Paul MJ, Sarker A, Brownstein JS, Nikfarjam A, Scotch M, Smith KL, et al. Social Media  
370 Mining for Public Health Monitoring and Surveillance. Pacific Symposium on Biocomputing.  
371 2016;21(January):468-79.
- 372 35. Page MJ, McKenzie JE, Bossuyt PM, Boutron I, Hoffmann TC, Mulrow CD, et al. The  
373 PRISMA 2020 statement: an updated guideline for reporting systematic reviews. PLOS  
374 Medicine. 2021;18.
- 375 36. Thompson L, Rivara FP, Whitehill JM. Prevalence of Marijuana-Related Traffic on  
376 Twitter, 2012-2013: A Content Analysis. Cyberpsychology, Behavior, and Social Networking.  
377 2015;18(6):311-9.
- 378 37. Nasralah T, El-gayar OF, Wang Y. What Social Media Can Tell Us About Opioid Addicts :  
379 Twitter Data Case Analysis. 2019.
- 380 38. Mullins CF, Ffrench-O'Carroll R, Lane J, O'Connor T. Sharing the pain: An observational  
381 analysis of Twitter and pain in Ireland. Regional Anesthesia and Pain Medicine. 2020;45(8):597-  
382 602.
- 383 39. Dai H, Hao J. Mining social media data on marijuana use for Post Traumatic Stress  
384 Disorder. Computers in Human Behavior. 2017;70:282-90.
- 385 40. Sarker A, Deroos A, Perrone J. Mining social media for prescription medication abuse  
386 monitoring: A review and proposal for a data-centric framework. Journal of the American  
387 Medical Informatics Association. 2020;27(2):315-29.
- 388 41. McGregor F, Somner JEA, Bourne RR, Munn-Giddings C, Shah P, Cross V. Social media  
389 use by patients with glaucoma: What can we learn? Ophthalmic and Physiological Optics.  
390 2014;34(1):46-52.
- 391 42. Cavazos-Rehg PA, Krauss M, Fisher SL, Salyer P, Grucza RA, Bierut LJ. Twitter chatter  
392 about marijuana. Journal of Adolescent Health. 2015;56(2):139-45.
- 393 43. Daniulaityte R, Nahhas RW, Wijeratne S, Carlson RG, Lamy FR, Martins SS, et al. "Time  
394 for dabs": Analyzing Twitter data on marijuana concentrates across the U.S. Drug and Alcohol  
395 Dependence. 2015;155:307-11.

- 396 44. Gonzalez-Estrada A, Cuervo-Pardo L, Ghosh B, Smith M, Pazheri F, Zell K, et al. Popular  
397 on YouTube: A critical appraisal of the educational quality of information regarding asthma.  
398 Allergy and Asthma Proceedings. 2015;36(6):e121-e6.
- 399 45. Krauss MJ, Sowles SJ, Mylvaganam S, Zewdie K, Bierut LJ, Cavazos-Rehg PA. Displays of  
400 dabbing marijuana extracts on YouTube. Drug and Alcohol Dependence. 2015;155:45-51.
- 401 46. Cavazos-Rehg PA, Sowles SJ, Krauss MJ, Agbonavbare V, Grucza R, Bierut L. A content  
402 analysis of tweets about high-potency marijuana. Drug and Alcohol Dependence. 2016;166:100-  
403 8.
- 404 47. Lamy FR, Daniulaityte R, Sheth A, Nahhas RW, Martins SS, Boyer EW, et al. "Those  
405 edibles hit hard": Exploration of Twitter data on cannabis edibles in the U.S. Drug and Alcohol  
406 Dependence. 2016;164:64-70.
- 407 48. Mitchell JT, Sweitzer MM, Tunno AM, Kollins SH, Joseph McClernon F. "I use weed for  
408 my ADHD": A qualitative analysis of online forum discussions on cannabis use and ADHD. PLoS  
409 ONE. 2016;11(5):1-13.
- 410 49. Andersson M, Persson M, Kjellgren A. Psychoactive substances as a last resort-a  
411 qualitative study of self-treatment of migraine and cluster headaches. Harm Reduction Journal.  
412 2017;14(1):1-10.
- 413 50. Greiner C, Chatton A, Khazaal Y. Online self-help forums on cannabis: A content  
414 assessment. Patient Education and Counseling. 2017;100(10):1943-50.
- 415 51. Turner J, Kantardzic M. Geo-social analytics based on spatio-temporal dynamics of  
416 marijuana-related tweets. ACM International Conference Proceeding Series. 2017;Part  
417 F1282:28-38.
- 418 52. Westmaas JL, McDonald BR, Portier KM. Topic modeling of smoking- and cessation-  
419 related posts to the American Cancer Society's Cancer Survivor Network (CSN): Implications for  
420 cessation treatment for cancer survivors who smoke. Nicotine and Tobacco Research.  
421 2017;19(8):952-9.
- 422 53. Yom-Tov E, Lev-Ran S. Adverse Reactions Associated With Cannabis Consumption as  
423 Evident From Search Engine Queries. JMIR Public Health and Surveillance. 2017;3(4):e77-e.
- 424 54. Cavazos-Rehg PA, Krauss MJ, Sowles SJ, Murphy GM, Bierut LJ. Exposure to and Content  
425 of Marijuana Product Reviews. Prevention Science. 2018;19(2):127-37.
- 426 55. Glowacki EM, Glowacki JB, Wilcox GB. A text-mining analysis of the public's reactions to  
427 the opioid crisis. Substance Abuse. 2018;39(2):129-33.
- 428 56. Meacham MC, Paul MJ, Ramo DE. Understanding emerging forms of cannabis use  
429 through an online cannabis community: An analysis of relative post volume and subjective  
430 highness ratings. Drug and Alcohol Dependence. 2018;188(March):364-9.
- 431 57. Leas EC, Nobles AL, Caputi TL, Dredze M, Smith DM, Ayers JW. Trends in Internet  
432 Searches for Cannabidiol (CBD) in the United States. JAMA network open.  
433 2019;2(10):e1913853-e.
- 434 58. Meacham MC, Roh S, Chang JS, Ramo DE. Frequently asked questions about dabbing  
435 concentrates in online cannabis community discussion forums. International Journal of Drug  
436 Policy. 2019;74:11-7.
- 437 59. Pérez-Pérez M, Pérez-Rodríguez G, Fdez-Riverola F, Lourenço A. Using twitter to  
438 understand the human bowel disease community: Exploratory analysis of key topics. Journal of  
439 Medical Internet Research. 2019;21(8).

- 440 60. Shi S, Brant AR, Sabolch A, Pollom E. False News of a Cannabis Cancer Cure. *Cureus*.  
441 2019;11(1):1-11.
- 442 61. Allem J-P, Escobedo P, Dharmapuri L. Cannabis Surveillance With Twitter Data: Emerging  
443 Topics and Social Bots. *American Journal of Public Health*. 2020;110(3):357-62.
- 444 62. Janmohamed K, Soale AN, Forastiere L, Tang W, Sha Y, Demant J, et al. Intersection of  
445 the Web-Based Vaping Narrative with COVID-19: Topic Modeling Study. *Journal of Medical*  
446 *Internet Research*. 2020;22(10).
- 447 63. Jia J, Mehran N, Purgert R, Zhang Q, Lee D, Myers JS, et al. Marijuana and Glaucoma: A  
448 Social Media Content Analysis. *Ophthalmology Glaucoma*. 2020.
- 449 64. Leas EC, Hendrickson EM, Nobles AL, Todd R, Smith DM, Dredze M, et al. Self-reported  
450 Cannabidiol (CBD) Use for Conditions With Proven Therapies. *JAMA network open*.  
451 2020;3(10):e2020977-e.
- 452 65. Merten JW, Gordon BT, King JL, Pappas C. Cannabidiol (CBD): Perspectives from  
453 Pinterest. *Substance Use and Misuse*. 2020;55(13):2213-20.
- 454 66. Saposnik FE, Huber JF. Trends in web searches about the causes and treatments of  
455 autism over the past 15 years: Exploratory infodemiology study. *JMIR Pediatrics and Parenting*.  
456 2020;3(2).
- 457 67. Song S, Cohen AJ, Lui H, Mmonu NA, Brody H, Patino G, et al. Use of GoFundMe® to  
458 crowdfund complementary and alternative medicine treatments for cancer. *Journal of Cancer*  
459 *Research and Clinical Oncology*. 2020;146(7):1857-65.
- 460 68. Tran T, Kavuluru R. Social media surveillance for perceived therapeutic effects of  
461 cannabidiol (CBD) products. *International Journal of Drug Policy*. 2020;77:102688-.
- 462 69. van Draanen J, Tao H, Gupta S, Liu S. Geographic Differences in Cannabis Conversations  
463 on Twitter: Infodemiology Study. *JMIR Public Health and Surveillance*. 2020;6(4):e18540-e.
- 464 70. Zenone M, Snyder J, Caulfield T. Crowdfunding cannabidiol (CBD) for cancer: Hype and  
465 misinformation on gofundme. *American Journal of Public Health*. 2020;110:S294-S9.
- 466 71. Pang RD, Dormanesh A, Hoang Y, Chu M, Allem JP. Twitter Posts About Cannabis Use  
467 During Pregnancy and Postpartum:A Content Analysis. *Substance Use and Misuse*. 2021;0(0):1-  
468 4.
- 469 72. Rhidenour KB, Blackburn K, Barrett AK, Taylor S. Mediating Medical Marijuana: Exploring  
470 How Veterans Discuss Their Stigmatized Substance Use on Reddit. *Health Communication*.  
471 2021;00(00):1-11.
- 472 73. Smolev ET, Rolf L, Zhu E, Buday SK, Brody M, Brogan DM, et al. "Pill Pushers and CBD  
473 Oil"—A Thematic Analysis of Social Media Interactions About Pain After Traumatic Brachial  
474 Plexus Injury. *Journal of Hand Surgery Global Online*. 2021;3(1):36-40.
- 475 74. Zenone M, Snyder J, Crooks VA. What are the informational pathways that shape  
476 people's use of cannabidiol for medical purposes? *Journal of Cannabis Research*. 2021;3(1).
- 477 75. Soleymanpour M, Saderholm S, Kavuluru R. Therapeutic Claims in Cannabidiol (CBD)  
478 Marketing Messages on Twitter. 2021 IEEE International Conference on Bioinformatics and  
479 Biomedicine (BIBM), Bioinformatics and Biomedicine (BIBM), 2021 IEEE International  
480 Conference on: IEEE; 2021. p. 3083-8.
- 481 76. Allem J-P, Majmundar A, Dormanesh A, Donaldson SI. Identifying Health-Related  
482 Discussions of Cannabis Use on Twitter by Using a Medical Dictionary: Content Analysis of  
483 Tweets. *JMIR Form Res*. 2022;6(2):e35027.

- 484 77. Yue L, Chen W, Li X, Zuo W, Yin M. A survey of sentiment analysis in social media.  
485 Knowledge and Information Systems. 2019;60(2):617-63.
- 486 78. Blei DM, Lafferty JD. Topic models. Chapman and Hall/CRC; 2009. p. 101-24.
- 487 79. Himelboim I. Social Network Analysis (Social Media). The International Encyclopedia of  
488 Communication Research Methods. 2017:1-15.
- 489 80. Allem JP, Escobedo P, Dharmapuri L. Cannabis surveillance with twitter data: Emerging  
490 topics and social bots. American Journal of Public Health. 2020;110(3):357-62.
- 491 81. Kazemi DM, Borsari B, Levine MJ, Dooley B. Systematic review of surveillance by social  
492 media platforms for illicit drug use. Journal of Public Health (United Kingdom). 2017;39(4):763-  
493 76.
- 494 82. Grinspoon L, Bakalar JB. Marihuana, the forbidden medicine: Yale University Press;  
495 1997.
- 496 83. Belackova V, Ritter A, Shanahan M, Chalmers J, Hughes C, Barratt M, et al. Medicinal  
497 cannabis in Australia—Framing the regulatory options. Sydney: Drug Policy Modelling Program.  
498 2015.
- 499 84. CPMG. Home Office Circular 1 November 2018: Rescheduling of cannabis-based products  
500 for medicinal use in humans. In: Unit CDaA, editor. London, United Kingdom: Crime, Policing,  
501 and Fire Group (CPMG); 2018.
- 502 85. Shover CL, Humphreys K. Six policy lessons relevant to cannabis legalization. Am J Drug  
503 Alcohol Abuse. 2019;45(6):698-706.
- 504 86. EMCDDA. Cannabis policy: status and recent developments Lisbon, Portugal: The  
505 European Monitoring Centre for Drugs and Drug Addiction; 2021 [cited 2021 August]. Available  
506 from: [https://www.emcdda.europa.eu/publications/topic-overviews/cannabis-policy/html\\_en](https://www.emcdda.europa.eu/publications/topic-overviews/cannabis-policy/html_en).
- 507 87. Lardon J, Bellet F, Aboukhamis R, Asfari H, Jaulent M, Beyens M, et al. Evaluating Twitter  
508 as a complementary data source for pharmacovigilance Expert Opinion on Drug Safety.  
509 2018;17(8):763–74.
- 510 88. Bode L, Davis-Kean P, Singh L, Berger-Wolf T, Budak C, Chi G, et al. Study designs for  
511 quantitative social science research using social media. 2020.
- 512 89. Chancellor S, De Choudhury M. Methods in predictive techniques for mental health  
513 status on social media: a critical review. npj Digital Medicine. 2020;3(1).
- 514 90. Abbasi A, Sarker A, Ginn R, Smit K, Oconnor K, Abbasi A. Social Media Analytics for Smart  
515 Health.

## 516 **Supporting information**

517 S1. Quality assessment checklist (Doc)

518 S2. PRISMA checklist (Doc)

PRISMA 2020 flow diagram

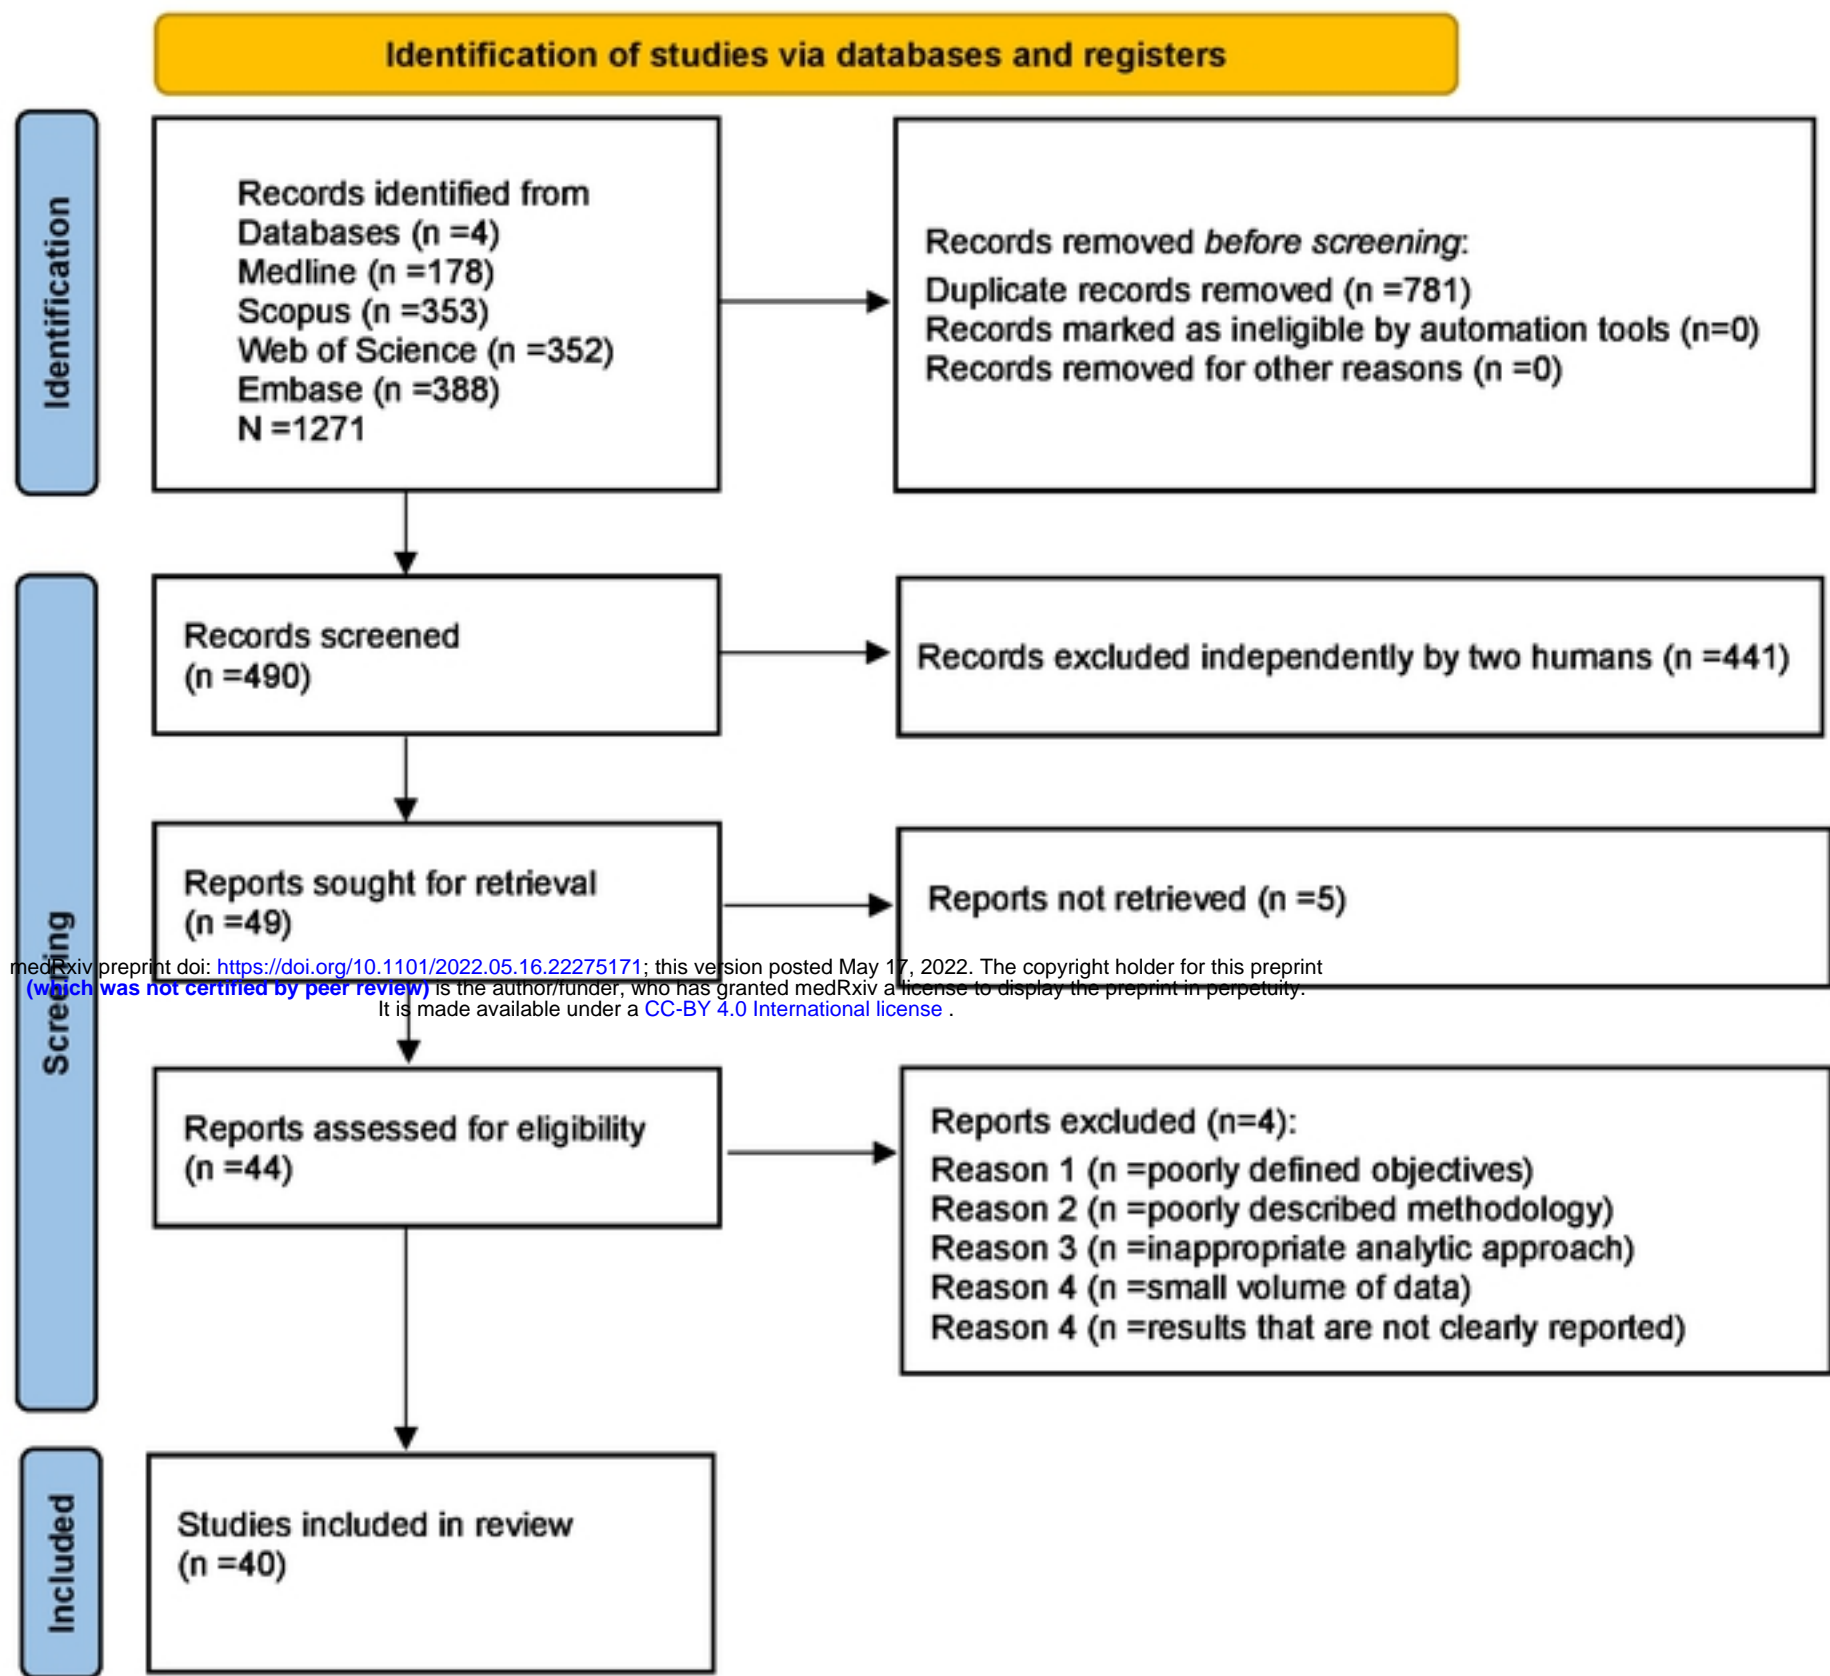

From: Page MJ, McKenzie JE, Bossuyt PM, Boutron I, Hoffmann TC, Mulrow CD, et al. The PRISMA 2020 statement: an updated guideline for reporting systematic reviews. *BMJ* 2021;372:n71. doi: 10.1136/bmj.n71

For more information, visit: <http://www.prisma-statement.org/>

Fig1 - PRISMA flow diagram
